# Supplementary material for: High resolution identity testing of inactivated poliovirus vaccines
Source: PubMed Central journal article supplement (PMC4504004; doi:10.1016/j.vaccine.2015.05.052), 2015-07-09

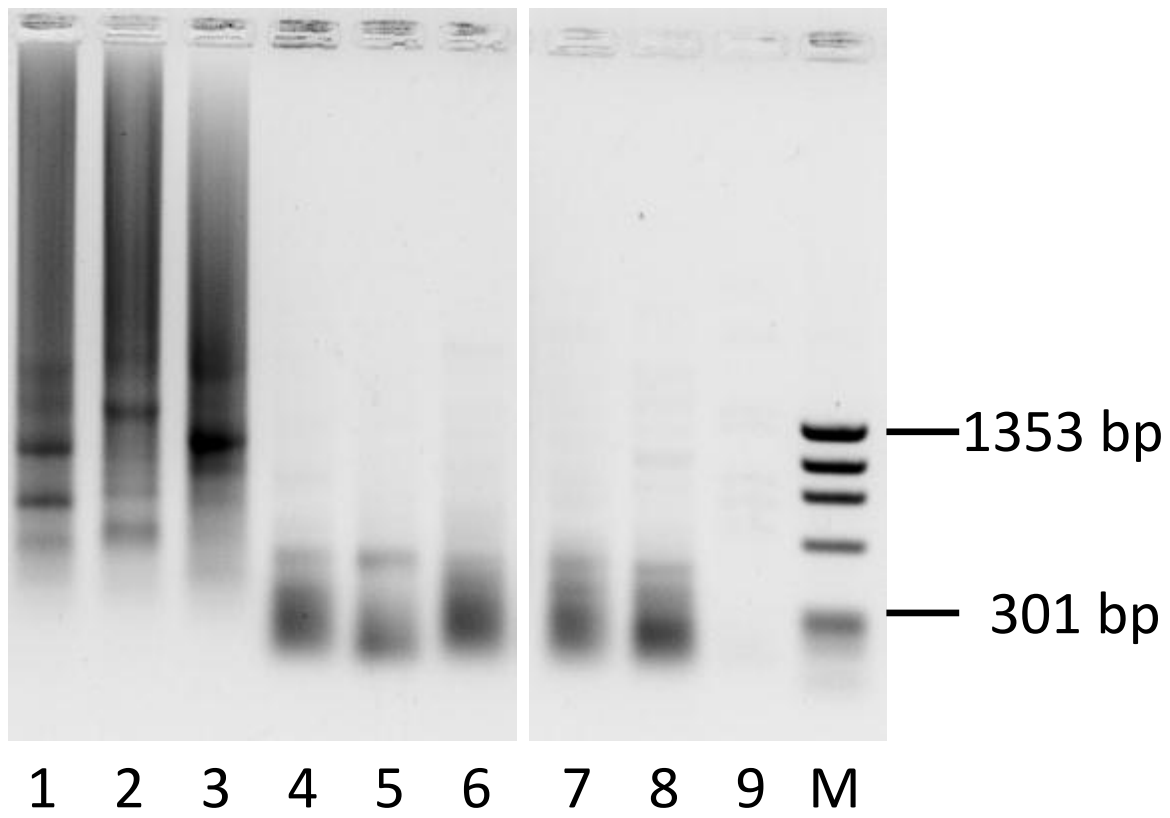

Supplement: mmc1.pdf [file mmc1.pdf]
