# Supplementary material for: High resolution identity testing of inactivated poliovirus vaccines
Source: PubMed Central journal article supplement (PMC4504004; doi:10.1016/j.vaccine.2015.05.052), 2015-07-09

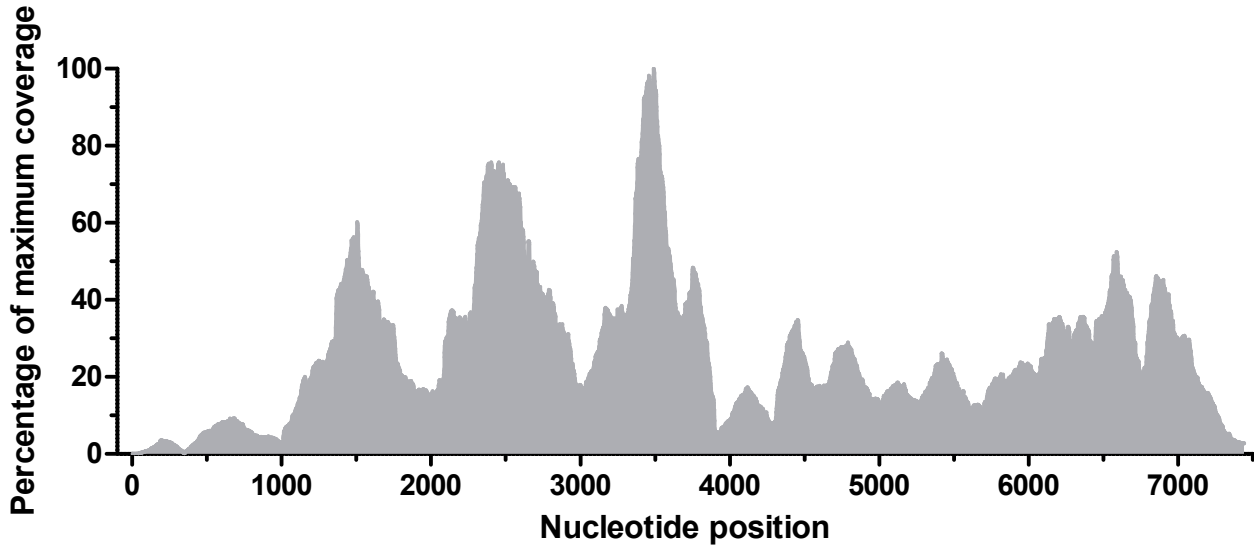

Supplement: mmc2.pdf [file mmc2.pdf]
